# Supplementary material for: Targeted Modulation of Chicken Genes In Vitro Using CRISPRa and CRISPRi Toolkit
Source: MDPI journal article supplement (doi:10.3390/genes14040906), 2023-04-13
Supplement: s1 [file s1]

## Supplementary Materials

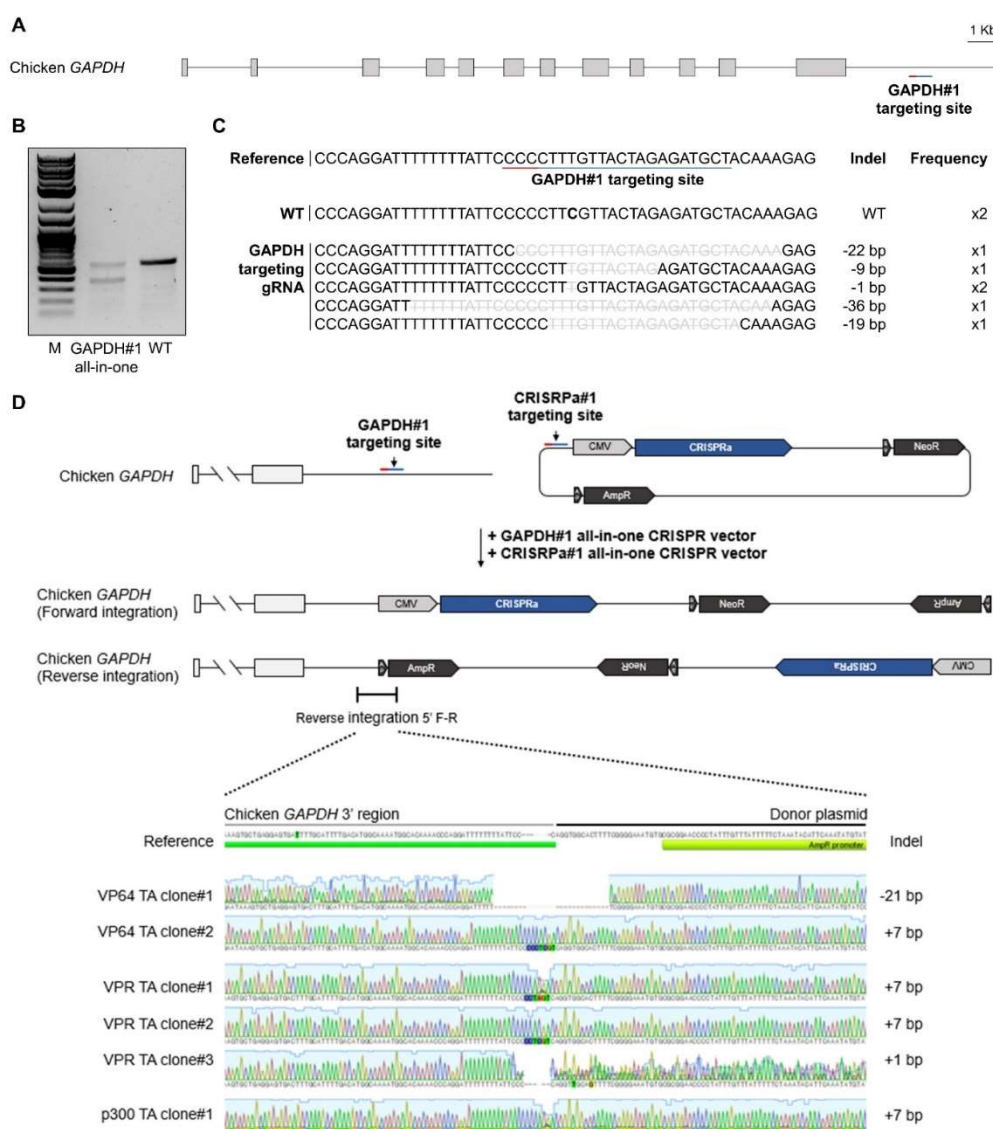

**Figure S1.** Targeted gene insertion of CRISPRa vectors into the 3' region of chicken *GAPDH* gene. (A) Gene structure of chicken *GAPDH* gene. Scale bar, 1 kb. (B,C) T7E1 assay and sequencing analysis of DF-1 cells transfected with the all-in-one CRISPR vector targeting the 3' region of chicken *GAPDH* gene (GAPDH#1). (D) Schematic representation of CRISPR/Cas9-NHEJ-mediated CRISPRa vector integration and genomic DNA analysis of targeted gene insertion in chicken DF-1 cells by knock-in-specific PCR and sanger sequencing analysis. Introduction of the donor plasmids containing CRISPRa components and two all-in-one CRISPR vectors targeting CRISPRa vectors (CRISPRa#1) and GAPDH#1 for targeted gene insertion. Blue bars indicate gRNA recognition sequences and red bars indicate protospacer adjacent motif (PAM) sequences. Nucleotide sequences of chicken genomic DNA and the donor plasmid are shown.

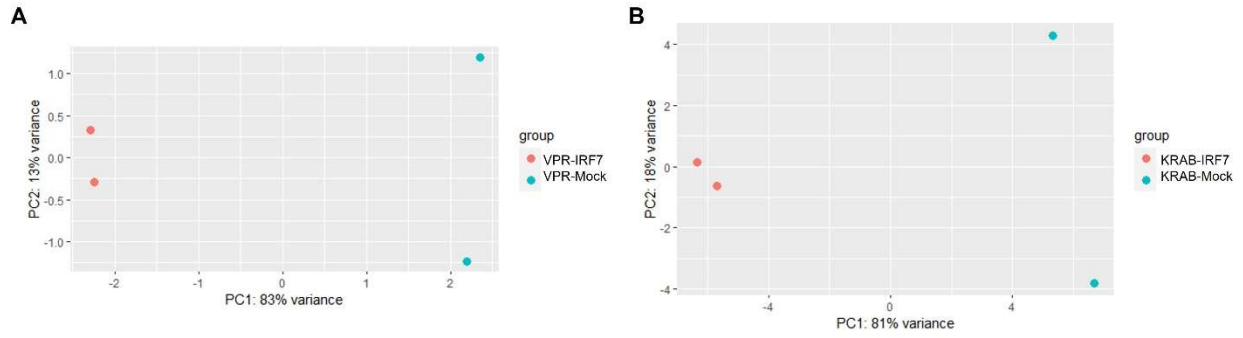

**Figure S2.** Principal component analysis (PCA) of bulk RNAseq libraries. **(A)** PCA plot of VPR IRF7 activation and VPR mock cells. **(B)** PCA plot of KRAB IRF7 repression and KRAB mock cells.

### Supplementary Table

**Table S1.** Oligos used in this study.

| Uses                                | Name             | Sequence (5'–3')          |
|-------------------------------------|------------------|---------------------------|
| <i>GAPDH</i> targeting              | GAPDH gRNA#1 F   | CACCGAGCATCTCTAGTAACAAAGG |
| gRNA construction                   | GAPDH gRNA#1 R   | AAACCCTTTGTTACTAGAGATGCTC |
| CRISPRa vector target               | CRISPRa gRNA#1 F | CACCGTCTCCCGATCCGTCGACGTC |
| ing                                 |                  |                           |
| gRNA construction                   | CRISPRa gRNA#1 F | AAACGACGTCGACGGATCGGGAGAC |
| CRISPRa components confirm          | VP64 qRT F       | GACGCATTGGACGATTTTGATC    |
|                                     | VP64 qRT R       | CAGCATGTCCAGGTCGAAATC     |
|                                     | VPR qRT F        | GGCACACTGTCTGAAGCTCT      |
|                                     | VPR qRT R        | CCTCGGGGTATTCCATCAGC      |
|                                     | P300 qRT F       | GTCAACCTGTGGACCCTCAG      |
|                                     | P300 qRT R       | GACCTCAGAGAGCTTGGAGC      |
| CRISPRi components confirm          | dCas9 qRT F      | CATCAGGGAGCAGGCAGAAA      |
|                                     | dCas9 qRT R      | GATGAATCAGTGTGGCGTCC      |
|                                     | KRAB qRT F       | CACGTGAGGAGTGGAATTGC      |
|                                     | KRAB qRT R       | GTTCTTCCCCCTTTTCGAGC      |
|                                     | MeCP2 F          | GGTCATCAAGCGACCTGGAA      |
|                                     | MeCP2 R          | TTTGACCTCGATGGACACGG      |
| Knock-in confirm                    | GAPDH knock-in F | GTGTTGGAGGGCTGTGACTG      |
|                                     | GAPDH knock-in R | ATAATACCGCGCCACATAGC      |
| gRNA expressing vector construction | IRF7 gRNA1 F     | CACCGGGGATATCCGCACTACGCGG |
|                                     | IRF7 gRNA1 R     | AAACCCGCGTAGTGCGGATATCCCC |
|                                     | IRF7 gRNA2 F     | CACCGGAAACTGAAACCGCTCCGGT |
|                                     | IRF7 gRNA2 R     | AAACACCGGAGCGGTTTCAGTTTCC |
|                                     | IRF7 gRNA3 F     | CACCGGTGCGGAAGCCTCGGAGCCA |
|                                     | IRF7 gRNA3 R     | AAACTGGCTCCGAGGCTTCCGCACC |

|         |                 |                            |
|---------|-----------------|----------------------------|
|         | IRF7 gRNA4 F    | CACCGGCTGACCGTGCCGCCCCGCA  |
|         | IRF7 gRNA4 R    | AAACTGCGGGGCGGCACGGTCAGCC  |
|         | IRF7 gRNA5 F    | CACCGGGTCCGGGTCGATCCAGCAG  |
|         | IRF7 gRNA5 R    | AAACCTGCTGGATCGACCCGGACCC  |
|         | PPARG gRNA1 F   | CACCGCGTTCGCTCTTCGAACGCCC  |
|         | PPARG gRNA1 R   | AAACGGGCGTTTCGAAGAGCGAACGC |
|         | PPARG gRNA2 F   | CACCGCCGAGGGGCGAGCTCGCGCC  |
|         | PPARG gRNA2 R   | AAAC GCGCGAGCTCGCCCCTCGGC  |
|         | PPARG gRNA3 F   | CACCGCGGTGCCTGGCCGGTAGGAT  |
|         | PPARG gRNA3 R   | AAACATCCTACCGGCCAGGCACCGC  |
|         | HMGA1 gRNA1 F   | CACCGTCTGAGAGCGTGAAGAAGGG  |
|         | HMGA1 gRNA1 R   | AAACCCCTTCTTCACGCTCTCAGAC  |
|         | HMGA1 gRNA2 F   | CACCGGCACCTCCAACCGACCCTAC  |
|         | HMGA1 gRNA2 R   | AAACGTAGGGTCGGTTGGAGGTGCC  |
|         | HMGA1 gRNA3 F   | CACCGACGCGCTGGAAATTAAAGTA  |
|         | HMGA1 gRNA3 R   | AAACTACTTTAATTTCCAGCGCGTC  |
|         | SMARCB1 gRNA1 F | CACCGAGGGCGTCGGGTCGGTGTTG  |
|         | SMARCB1 gRNA1 R | AAACCAACACCGACCCGACGCCCTC  |
|         | SMARCB1 gRNA2 F | CACCGCGTACAAACGTTGACTCCCG  |
|         | SMARCB1 gRNA2 R | AAACCGGGAGTCAACGTTTGTACGC  |
|         | SMARCB1 gRNA3 F | CACCGGCGGGCGGCAGGTAGAAAAG  |
|         | SMARCB1 gRNA3 R | AAACCTTTTCTACCTGCCGCCCCGCC |
|         | MOCK gRNA1 F    | CACCGGTGCGTTTCGTCTATACGCC  |
|         | MOCK gRNA1 R    | AAACGGCGTATAGACGAAACGCAC C |
|         | MOCK gRNA2 F    | CACCGCGGTAACACGTCTATACCGG  |
|         | MOCK gRNA2 R    | AAACCCGGTATAGACGTGTTACCGC  |
|         | MOCK gRNA3 F    | CACCGGATCAGCTACGATCCGCCGG  |
|         | MOCK gRNA3 R    | AAACCCGGCGGATCGTAGCTGATCC  |
| qRT-PCR | GAPDH cDNA F    | GGTGGTGCTAAGCGTGTTAT       |
|         | GAPDH cDNA R    | ACCTCTGCCATCTCTCCACA       |
|         | IRF7 cDNA F     | GAAAGCCACCGCCGCTCTAT       |
|         | IRF7 cDNA R     | ACGCACTTCTTACACACCTCC      |
|         | PPARG cDNA F    | CCAGCGACATCGACCAGTTA       |
|         | PPARG cDNA R    | TTCCTGCAGTGGTGATGCAT       |
|         | HMGA1 cDNA F    | AGAACAAGGCCAGCTCCAAA       |
|         | HMGA1 cDNA R    | GGGTGATGATGAGGTAGCGG       |
|         | SMARCB1 cDNA F  | GCCCTCTTCTGGAAACCCTC       |
|         | SMARCB1 cDNA R  | TCCATCTGGGGAGAGGAGTG       |
